1 Full title: The ETKA study - Impact of early therapy termination on treated phonemes in  
2 conversational speech tasks in children aged 5 to 6 years with phonologically delayed  
3 development: protocol for a multicenter randomized controlled trial

4 Short title: Early therapy termination in children with speech sound disorders

5  
6 Doris Detter-Biesl<sup>1¶</sup>, Bernhard Schwartz<sup>2</sup>

7  
8  
9 <sup>1</sup>Study program Speech and Language Therapy, University of Applied Sciences for Health  
10 Professions Upper Austria, Linz, Upper Austria, Austria

11  
12 <sup>2</sup>Department for Research & Development, University of Applied Sciences for Health  
13 Professions Upper Austria, Linz, Upper Austria, Austria

14  
15  
16 \*Bernhard Schwartz

17 E-mail address: [Bernhard.schwartz@fhgooe.ac.at](mailto:Bernhard.schwartz@fhgooe.ac.at) (BS)

18  
19 <sup>¶</sup>Doris Detter-Biesl

20  
21 Funding

22 This study was fully supported by the University of Applied Sciences for Health Professions  
23 Upper Austria under [grant number P-2018-044, internal university fund, "ETKA"]. The funder  
24 did not play a role in neither the design of the study protocol nor in the writing of this article.  
25 Furthermore, the funder will not have any influence on data collection, management,  
26 analysis, or publication.

27  
28 Competing interests

29 The authors declare that they have no competing interests.

30  
31 Availability of data and materials

32 Data resulting from this study will be analyzed and published in journal articles under good  
33 scientific practice principles. Furthermore, main findings will be published freely accessible  
34 on ClinicalTrials.gov.

35

NOTE: This preprint reports new research that has not been certified by peer review and should not be used to guide clinical practice.

## 36 **Abstract**

37 **Background:** Children with speech and language disorders frequently display speech sound  
38 disorders, the treatment of which improves children's ability to communicate. However, there  
39 is a significant gap between those therapy capacities needed and those provided in Austria.  
40 In addition, as the effect of early therapy termination has not yet been systematically  
41 evaluated, the aim of this project is to investigate the influence of an early therapy  
42 termination on phonological processes in children aged 5 to 6 years with phonologically  
43 delayed development.

44 **Methods/Design:** Forty 5- to 6-year-old children, currently participating in speech therapies  
45 in the Upper Austrian region will participate in this multicenter randomized controlled trial.  
46 The participants will be randomly allocated to either the intervention group (early therapy  
47 termination) or the control group (uninterrupted ongoing therapy) by envelop randomization.  
48 Phoneme accuracy in spontaneous speech determined during 15 minutes of conversational  
49 sampling and phoneme accuracy for single-word production determined with the PLAKKS  
50 assessment will be used to assess therapy efficacy. The results from both groups will be  
51 compared regarding the correct use of the target phoneme/consonant cluster in  
52 conversational speech situation.

53 **Discussion:** This study will explore the effect of early therapy termination on speech sound  
54 disorders in 5- to 6-yearold children. If an early termination exhibits non-inferiority to the  
55 current ongoing therapy, therapy resources could be used more effectively. Subsequently,  
56 earlier therapy starts for more children could be facilitated and negative consequences of  
57 delayed therapies could be counteracted.

58 **Ethics and dissemination:** The study was approved by an institutional review board (ID: A-  
59 2019-035). Dissemination will be achieved through peer-review conferences and journals.

60 **Trial registration:** The study is registered at ClinicalTrials.gov (Identifier: NCT03972891,  
61 Registered 4 June 2019, <https://www.clinicaltrials.gov/ct2/show/NCT03972891>).

62

### 63 **Keywords:**

64 speech sound disorders, children, speech and language therapy, RCT

65

66

## 67 **Introduction**

68 Many children with speech and language disorders have speech sound disorders. The  
69 worldwide prevalence ranges between 2 and 25 %[1], with 16 % in German-speaking  
70 countries in 3- to 8-year-old children[2]. Speech sound disorders (SSD) are defined by a  
71 delayed acquisition of developmentally appropriate speech sounds[3] and are characterized

72 by high frequency errors relative to the child's age peers[4]. This reduces the intelligibility of  
73 speech and can have a negative impact on the ability of communication.

74 The terms articulation disorders, phonologically delayed disorders, phonological disorders,  
75 expressive phonological disorders or deficient output phonology are used synonymously in  
76 literature even though they essentially describe different problems and therefore cannot be  
77 applied to describe homogeneous groups[3]. For instance, several groups can be  
78 distinguished, such as articulation disorders, delayed phonological development, consequent  
79 phonological disorders and inconsequent phonological disorders[5]. In particular, speech  
80 sound disorders can have an impact on the development of literacy and place the child at  
81 risk of developing dyslexia when SSD persists beyond the age of school entry[3, 4, 6–9]. 4-  
82 to 5-year-old children with communication impairment have significant poorer reading and  
83 writing skills as well as report more bullying or poor peer relationships compared to 7- to 9-  
84 year-old peers[10].

85 Early detection of speech and language disorders and a timely delivery of appropriate  
86 measures/intervention in the event of disorders can prevent the secondary consequences of  
87 speech sound disorders, with the critical period for rapid service being the final two years  
88 before school entry[4]. Therefore, the goal of speech therapy is to improve speech  
89 intelligibility and to maximize the child's communication skills for social and educational  
90 participation[11].

91  
92 Existing therapy concepts differ both in theoretical background and in resulting procedures.  
93 This approach is articulatorily/motorically oriented and/or phonologically/linguistically  
94 oriented[12]. Phonological intervention is an improvement of the speech sound system,  
95 aiming at the generalization of taught and untaught phonemes and phonological  
96 structures[13, 14]. In phonological treatment children should learn the relevant characteristics  
97 of the phonology of ambient language. The selection of the phoneme targets depends on  
98 how the targets are expected to affect the child's larger sound system. Usually, in  
99 phonological treatment more than one phoneme and meaningful words are used in therapy.  
100 In contrast to the phonologically-based intervention, the articulatory-oriented treatment  
101 focusses on the correction of individual phonemes directed at correctly isolated speech  
102 sounds[13, 15]. The choice of phoneme targets in the articulatory-oriented therapy depends  
103 on the development order of acquisition, stimulability of the isolated sounds and the effect on  
104 intelligibility. Usually, at the beginning of the articulatory therapy, there is an ear training and  
105 consequently the clinical interventions are considered to improve the children's skills to build  
106 the target speech sounds. The length and complexity of the utterances are gradually  
107 increased until the child uses the speech sounds in conversational speech[13].

108 A key factor for the effectiveness of the different treatment approaches is the outcome to be  
109 achieved[16]. Particularly, due to the heterogeneity of children with speech sound disorders,  
110 different interventions are effective for each child and a variety of approaches are effective  
111 for similar problems[17, 18]. Therapeutic measures should be adapted to the needs of each  
112 child and oriented towards the international classification of functionality (ICF). Furthermore,  
113 the clinical decisions regarding assessments and intervention should be based on the  
114 evidence-based practice (EBP)[19]. According to the latest findings, there is no tailor-made  
115 intervention approach that can be used exclusively.

116 The quality and quantity of the intervention (therapy intensity) in a certain period of time are  
117 widely discussed [19–21]. The optimal therapy intensity to achieve a function gain on speech  
118 intelligibility cannot be determined and there is an ongoing discussion on the optimal duration  
119 of the intervention and the dose frequency[19–22].

120 While in phonological-oriented therapy concepts short periods of intervention with a higher  
121 intensity (more than one time per week) are reported, children in articulation therapy are  
122 guided clinically to produce the respective target phoneme in isolation aiming at continuous  
123 speech in a longer therapy phase (usually one time per week)[13]. There are indications that  
124 shorter therapy periods with increased therapy intensity (three times a week) may be more  
125 effective than longer therapy phases with fewer therapy units (e.g. one time per week)[4, 19,  
126 21]. Interval therapy (i.e. therapy phases followed by therapy breaks) was found to be mostly  
127 effective when considering a connection with higher treatment intensity[20, 22].

128 Therapy intensity relies on three factors: a) number of properly implemented teaching  
129 episodes per session (dose); b) task or activity that are delivered within the teaching  
130 episodes (dose form) and c) the number of sessions per therapy phase (dose frequency) [19,  
131 20, 23]. Nevertheless, the estimation of therapy dose measurement poses difficulties (i.e.  
132 each therapy unit would have to be recorded and analyzed in order to determine the exact  
133 dose). Measuring the dose within a therapy unit is difficult and depends on qualitative factors  
134 such as the therapist's professional experience. The form of the dose depends, among other  
135 factors, on the therapist's knowledge and the child's abilities. The dose frequency as well the  
136 total duration of the intervention – the period between the first contact and the end of the  
137 treatment[18]–, can be quantitatively measured but depends on the respective prescription  
138 mode, expert opinions and on factors that can hardly be influenced (illnesses, holidays,  
139 etc.)[22]. In addition to the discussion on therapy intensity, the total amount of therapy hours  
140 cannot be generalized for each child. Twelve to twenty hours of intervention as well as  
141 parental inclusion have shown improvements in the functional capacity of the linguistic  
142 output[17]. It remains to be seen which treatment, which treatment intensity and thus which  
143 duration of the treatment is required to achieve functional gains in conversational speech[4,  
144 20].

145 Unfortunately, due to the high demand for speech and language therapy and the shortage of  
146 therapists in the suburban and rural areas, many children are on the waiting list for speech  
147 and language therapies. In some parts of this country, recent surveys exhibited an average  
148 delayed start of speech and language therapies between from 3 to 6 months, which in some  
149 cases can exceed more than one year[24, 25].

150

## 151 **Study objectives**

152 There is an ongoing discussion about the frequency and duration of speech and language  
153 therapy. Due to this, the criteria for therapy breaks, intervals and termination are based on  
154 the clinical experience rather than clinical evidence. Hence, this study design was developed  
155 to answer the following primary research question:

156

157 Do early therapy terminations in children aged 5 – 6 years with phonologically delayed  
158 development significantly impact the use of the target sound / target consonant cluster in  
159 spontaneous speech if a threshold value of 70 – 80 % correct use of the target sound is  
160 reached before early therapy termination?

161

## 162 **Hypothesis**

163 We claim in our hypothesis that early therapy termination after 70 – 80 % correct use of  
164 target sound is non-inferior to a continuous therapy on conversational speech tasks.

165

## 166 **Material and Methods**

### 167 **Aims**

168 As persistent SSD beyond primary school entrance age can have negative long-term  
169 consequences on social, academic and professional development, waiting times for speech  
170 and language therapy should not exceed 2 months[4]. However, throughout Austria there is a  
171 shortage of 127,000 speech and language therapy places for children and young adults[24],  
172 and it is necessary to find appropriate solutions for this problem. One approach could be the  
173 early termination of therapies after a predefined threshold. Hence, the aim of this randomized  
174 controlled trial was to investigate the efficiency of an early-terminated (i.e. after 70 – 80 %  
175 correct use of the target sound) speech therapy.

176

### 177 **Study design**

178 ETKA is a multicenter randomized controlled parallel two arm trial comparing early therapy  
179 termination (ETT – intervention) with an ongoing therapy (OT – control condition). Children

180 already undergoing speech therapy will be recruited by speech and language therapists of  
181 two independent institutions located in all districts in Upper Austria. Primary assessments will  
182 be performed at baseline ( $t_0$ ) and after 12 weeks ( $t_1$ ). In addition, follow-up assessment will  
183 be performed after school entry, prior to the introduction of the grapheme of the target sound  
184 / sounds ( $t_2$ ) and 1 – 2 weeks after the introduction of the grapheme of the target sound /  
185 sounds ( $t_3$ ). The SPIRIT study schedule is illustrated in Fig 1.

186  
187

188 *Fig 1. SPIRIT study schedule of enrolment, interventions, and assessments*

189

## 190 **Participants selection**

191 The study population consists exclusively of children who are already undergoing speech  
192 therapy. Children between the ages of 5 and 6 of all sexes and ethnicities will be represented  
193 in the collective.

194

## 195 **Recruitment centers**

196 The participants will be recruited by speech and language therapists (SLP) of two  
197 independent institutions, *Caritas für Kinder und Jugendliche* and *Volkshilfe GSD GmbH*. The  
198 therapy institutions are located in all districts in Upper Austria and children are already  
199 undergoing speech therapy treatment. Eligible children - not receiving financial benefits for  
200 study participation - will be enrolled in the first half of 2022.

201 The completion of the study enrolment is expected by May 2023.

202

## 203 **Subject inclusion criteria**

204 *Children are included under the following criteria*

- 205 a) phonological delay of one or two of these phonological processes: palatal fronting  
206 /sch/ to /s/ or /ch/ to /s/, velar fronting /k g/ to /t d/ or contact assimilation /dr tr/ to /gr  
207 kr/,  
208 b) correct use of the treated phoneme / consonant cluster in conversational speech  
209 situations during therapy from 70 – 80 %,  
210 c) the phonological process has not yet been treated by another speech therapist,  
211 d) informed consent (children and legal guardians)  
212 e) therapy frequency on a regular weekly basis, but at least once every two weeks,  
213 f) physiologically developed prescriptive skills,  
214 g) good knowledge of German.

215

## 216 **Subject exclusion criteria**

217 *Children are excluded under the following criteria*

- 218 a) children younger than 5 and older than 6 years,
- 219 b) correct use of the treated phoneme / consonant cluster in conversational speech  
220 situations during therapy to less than 70 %,
- 221 c) other speech sound disorders: consistent or inconsistent phonological disorders or  
222 isolated articulation disorders or childhood apraxia of speech
- 223 d) myofunctional disorders
- 224 e) speech and language disorders in the context of comorbidities,
- 225 f) deficits in prescriptive skills.

226

## 227 **Randomization and blinding**

228 After the baseline assessment is completed, the children are randomly allocated to either the  
229 intervention group (ETT) or the control group (OT) by envelopes. Each envelope (i.e. 20 blue  
230 and 20 white envelopes) was previously filled with the group assessment (“early therapy  
231 termination” or “continuous therapy”) and signed by an independent biometrician. White  
232 envelopes will only be used when all blue envelopes are opened to ensure that 20 group-  
233 balanced children can be recruited for interims analysis. The non-transparent envelope is  
234 randomly drawn and opened by the therapist. The randomized result, the name of the child  
235 and the date of the assignment will be documented in the case report form (CRF).

236 For children enrolled in the ETT Group, therapy will be terminated early and children  
237 randomized in the OT Group will receive ongoing therapy until more than 90 % of the target  
238 phoneme / target consonant cluster can be used correctly in spontaneous speech situations  
239 (for max. 12 weeks). Due to the intervention type (i.e. early termination of on ongoing  
240 therapy) this study is planned as an open-label study. Hence, study participants (children and  
241 their caregivers), the speech and language pathologists, who administered the clinical testing  
242 and treatment, and the study leader are not blinded to the intervention.

243

## 244 **Sample size**

245 The sample calculation was carried out using the program G\* Power 3.1.9.2. The sample  
246 calculation is based on the correctness of the target phoneme in spontaneous speech  
247 situations in the control group from  $96 \pm 3$  %, a limit of  $93.12 \pm 3$  % for the equivalent  
248 consideration. It is also based on a conservative sample calculation (not normally distributed,  
249 bilaterally) considering the alpha-value of 5 %, the beta-value of 20 %, a balanced group  
250 ratio und a drop-out rate of about 10 %. Based on these calculation assumptions, 40 children  
251 must be included in the study in order to achieve a sufficient statistical power above 0.80.



252

## 253 **Study groups**

254 The group allocation starts as soon as 70 – 80 % of the target sound / target consonant  
255 cluster can be used correctly in conversational speech during therapy tasks.

256

### 257 Intervention group (early termination of therapy)

258 Within the intervention group, the speech and language therapy will be stopped. This also  
259 includes a stop of providing language-specific exercises by the caregivers. Nevertheless,  
260 language-specific strategies in everyday life can be applied (e.g. modelling techniques).

261

### 262 Control group (ongoing therapy)

263 Within the control group, children will continue to receive ongoing speech and language  
264 therapy until more than 90 % of the target sound / target consonant cluster can be used  
265 correctly in conversational speech situation (for max. 12 weeks).

266

## 267 **Outcome and study assessments**

268 As illustrated in Fig 1 the outcome measures will be assessed at baseline( $t_0$ ): as soon as 70  
269 – 80 % of the target sound / target consonant cluster can be used correctly in spontaneous  
270 speech tasks, and 12 weeks after baseline ( $t_1$ ). The follow-up measurements will be  
271 performed after school entry prior ( $t_2$ ) and after ( $t_3$ ) the introduction of the grapheme of  
272 interest.

273

## 274 **Outcome measures**

275 The measurements are performed by speech and language therapists who have at least two  
276 years of experience in the field of children's speech and language therapy.

277 As data collection influences articulation accuracy and articulation errors[26], two different  
278 measuring methods (i.e. picture-word articulation tests and continuous speech samples) will  
279 be used. The same materials and situation pictures for all test times allow for a direct  
280 comparison.

281

### 282 Single-word test:

283 The articulation accuracy for single-word will be determined by the standardized single-word  
284 test "*Psycholinguistische Analyse kindlicher Aussprachestörungen* (PLAKKS)"[27]. This  
285 assessment is usually used to determine speech sound disorders in children between 2.6  
286 and 5.11 years. PLAKKS[27] is commonly available for all therapists and it consists of 99  
287 colored pictures that have to be named by the test subjects.



288

289 Conversational speech sample:

290 Conversational sampling is a common method of measurement to describe the phoneme  
291 accuracy in conversational speech[28, 29]. In this study the length of the speech sample was  
292 set to 15 minutes to ensure a recording (recorded with a digital voice recorder) with a  
293 sufficient amount of words (at least 100 words) and target sound / target consonant cluster.

294

295 Picture description using funny situations pictures in a directed play will be used to motivate  
296 children to talk. For the sounds /sch/ and /ch/ the picture materials are called “*Such das!*”,  
297 and for /k g/ and the consonant cluster /tr dr/ it is called “*Plappersackkarten*”. In order to  
298 provide equal conditions for all children, the same pictures are selected for all children.

299 To produce conversational speech the therapist uses a set of cues described in Rvachew &  
300 Brosseau-Laprè[20]. Each cue consists of two possible answers (yes/no answers should be  
301 avoided) and by giving suggestions and assumptions, spontaneous statements by the test  
302 subjects can be evoked.

303

## 304 **Data collection, management, and analysis**

305 For analyzing the single-word-test, the speech and language therapists have to write the  
306 utterance in phonetic transcription in a protocol sheet.

307 Analysis of the recording of the speech samples will be carried out by the study  
308 management. The transcription of the speech samples will be done orthographically and in a  
309 broad phonetic transcription by using the International Phonetic Alphabet (IPA). The analysis  
310 will be based on the rule of the application Percentage of Consonants Correct (PCC)[30].

311 The percentile rank will be determined by counting the total of all target sounds produced by  
312 the child and determining the proportion that will be correctly formed. For evaluating the  
313 correct consonants the rules of the PCC[30] apply.

314 Several previous studies on the effectiveness of phonological therapy defined the therapy  
315 intensity, and the therapeutic method was mentioned to potentially influence the  
316 generalization of the target sounds into conversational speech[11, 17, 19, 31]. Therefore, the  
317 study authors’ query follows parameters at measurement time point  $t_0$ : number of therapy  
318 units before enrolment, involvement of parents and information on the therapeutic process  
319 before inclusion.

320 Data validation

321 Validation of data is made by programmed checks of range, validity, and consistency (e.g.  
322 range checks for data values) by study members. If necessary, queries are made by the  
323 study software or an authorized person. Based on the queries the investigator can check and  
324 clarify discrepancies. After the recording of all entries and clarification of all queries, the data

325 base will be closed upon completion of the study. An external data monitoring committee  
326 (DMC) was not formed for this study due to financial issues.

327

### 328 Data protection

329 All the data collected in this study may only be recorded by professionally qualified and  
330 authorized persons. All the participants will be given a unique and untraceable study number  
331 (ID) listed on a separate document. This identification list is only available to a selected circle  
332 of people, will remain in the study center after the study has finished and will not be given to  
333 the sponsor. Measurement data will only be stored in a pseudonymized way and the data  
334 security process follows the principle of good clinical practice and comply with the national  
335 data security regulations and/or the EU General Data Protection Regulation (GDPR).

336

### 337 **Statistical analysis**

338 Statistical analysis will be conducted using SPSS. In addition to descriptive statistics (e.g.  
339 means, standard deviations, 95 % confidence intervals) inference statistics will be applied.  
340 For normal distributed data of variance ANOVA will be used to analyze the group-by-time  
341 interaction effect. Paired and unpaired t-tests as well as their non-parametric equivalent (i.e.  
342 Wilcoxon-Signed-Rank-test & Mann-Whitney-U-test) will further be used to analyze within-  
343 group and between-group differences, respectively. Repeated measure ANOVA and  
344 Friedman-tests (for non-parametric metric parameters) will be applied for within-group  
345 differences, too (> 2 time points). To test for normality and homogeneity of variance,  
346 Kolmogorow-Smirnov or Shapiro-Wilk-Test and Levene-test will be used. In addition, Chi-  
347 squared and McNemar-test will be applied for nominal parameters. In general, two-sided  
348 tests with an alpha risk of 0.05 a beta risk of 0.2 will be accepted. For multiple testing, alpha  
349 values will be corrected with the Bonferroni procedure.

350

### 351 Population analysis

352 In accordance with current recommendations by national authorities (e.g. FDA guidelines like  
353 “Non-Inferiority Clinical Trials to Establish Effectiveness - Guidance for Industry), “Intention-to-  
354 treat” (ITT) and “Per-protocol” (PP) analysis will be executed.

355

### 356 Interims analysis

357 An interim analysis will be executed after 20 participants completed the last assessment day.  
358 If interim analysis exhibits a significant worsening in conversational speech situation for the  
359 ETT participants and for study leavers, the conventional speech situation will be continued.

360

### 361 Missing values

362 For single parameters with less than 5% of missing data, multiple imputation methods will be  
363 applied. For parameters with more than 5% of missing data, all data will be analyzed as  
364 available. The number and/or relative frequency of subjects prematurely leaving the study,  
365 subjects with (major) protocol deviations (leading to exclusion from the per-protocol set) and  
366 missing values will be listed and descriptively analyzed.

367

### 368 **Ethics approval and consent to participate**

369 The study was provided by the compliance with the provisions of the Helsinki Declaration  
370 ethical standards for clinical research and is in line with the rules of good scientific practice  
371 for future research projects or academic work. The study protocol (v1.01 from 21.01.2019)  
372 was approved by universities' institutional review board ("*Ethik- und Forschungskomitee (EF)*  
373 *der FH Gesundheitsberufe OÖ*") in February 2019 (A-2019-035) and was published on  
374 ClinicalTrials.gov in June 2019 (Identifier: NCT03972891). The ethics board will be informed  
375 about all substantial study protocol changes via amendments. The amendments will be  
376 signed by all the signatories to the original protocol.

377 All participants, the legal guardians of the children and the therapists, will be informed about  
378 the study by the study members. In addition, children, and their legal guardians (i.e. mainly  
379 the parents) will receive additional information about the study procedure by the speech  
380 therapist. While the study participants (i.e. children receiving speech therapy) will be asked  
381 for a verbal informed consent, their legal guardians will be asked to sign a written informed  
382 consent for study participation. Children's verbal informed consent will be documented in the  
383 case report form.

### 384 **Trial status**

385 The recruitment was planned to be started in February 2019 but has been cancelled due to  
386 the COVID-19 pandemic. Recruiting will start as soon as children will receive uninterrupted  
387 speech and language therapies again, which is expected in February 2023.

388

### 389 **Discussion**

390 To date, there is no consensus in the scientific community on how often, how long, and when  
391 therapy should be terminated. Due to the insufficient speech and language therapy supply in  
392 Austria, it is particularly important to generate the optimal threshold for the termination of  
393 speech and language therapy without imposing negative effects on the success of the  
394 therapy. An evidence-based threshold at which speech therapy is effective is still unclear and  
395 has mostly been derived from descriptive studies[4] or observational studies[22]. In addition,  
396 threshold-baseline for therapy termination achieving a generalization of the learned phoneme

397 into untreated context has not been investigated to date, or at least such studies are not  
398 known to the author despite research. However, ETKA aims at filling this research gap.

399

400 The ETKA study will determine whether early therapy termination in children between the  
401 ages of 5 and 6 with phonologically delayed development of one phonological process will  
402 lead to similar effects in the transfer of the target sound / target consonant cluster in  
403 continuous speech as uninterrupted, ongoing therapy does. Although the planned study is  
404 not based on a pilot study, assumptions on an early termination threshold (i.e. 70 – 80 %  
405 correct use of the treated phoneme in a conversational speech situation) are based on an  
406 existing interval therapy concept, called Psycholinguistic Phonologically-oriented Therapy  
407 (P.O.P.T)[32]. Within the course of this concept, improvements up to 90 % correctness of  
408 the target objective occurred after 12-week-therapy interruptions or early terminated therapy  
409 after 60 – 80 % correct implementation of the respective objective. In addition, some  
410 literature exposed that the performance level which children should reach in order to apply  
411 the correct sound to untrained words ranges between 40 and 75 % in correctness[20].

412

413 The ETKA study exhibits some limitations. Although the biometrist responsible for the  
414 statistical analysis will be blinded within this study, blinding based on the intervention type  
415 cannot be realized for the therapists and the participants. In addition, although some basic  
416 approaches for spontaneous speech assessments exist, the elicitation of spontaneous  
417 speech is not internationally standardized. Nevertheless, to reduce this performance bias,  
418 identical tasks (i.e. situation pictures and instructions) will be used in all implemented  
419 continuous speech measurements. Unfortunately, within this study statements about the  
420 cumulative intervention intensity cannot be drawn, because the number of implemented  
421 teaching episodes per session (dose) before early interruption starts cannot be estimated  
422 appropriately enough. Lastly, as each SLP can individually choose the speech sound  
423 therapy, study participants may have different therapy experience prior to the study inclusion.

424

425 Contrary to these limitations, ETKA study has several strengths, including the randomized  
426 controlled trial design, an *a priori* sample size calculation, strong inclusion criteria, identical  
427 environmental measurement conditions, and objective assessment of the primary outcome.  
428 By this stringent design, a maximum reduction of bias and sufficient statistical power, ETKA  
429 study – contrary to previous pilot studies – will be able to create enough evidence to  
430 determine if early therapy terminations can lead to similar therapy success as common  
431 therapies. If the ETKA study can show that an early therapy termination after reaching the 70  
432 – 80 % in the generalization of the treated sounds into conversational speech does not have  
433 a negative impact on language acquisition, speech and language therapy resources could be

434 used more effectively. Speech and language therapists could justify early therapy termination  
435 in parental counselling based on evidence and SLP would be able to treat more children with  
436 an identically number of working hours. Hence, more children on the waiting list could then  
437 obtain the service of speech and language therapy and long-term consequences of long  
438 waiting times could be reduced.

439  
440

## 441 **Authors' contributions**

442 Both authors were equally responsible for writing the manuscript and contributing to the  
443 research design. While first author DDB was mainly responsible for the speech therapy  
444 content, BS led the development of this manuscript and was mainly responsible for the  
445 statistical planning.

446 The authors declare that they have no competing interests.

447

## 448 **Acknowledgement**

449 The authors thank Barbara Kraxberger and Martina Bernegger from the non-profit-  
450 organisations „*Caritas für Kinder und Jugendliche*“ and “*Volkshilfe GSD GmbH*”, for agreeing  
451 to support the recruiting process and study assessments. They further thank Ulrike Haslinger  
452 for proofreading the article.

453

## 454 **References**

- 455 1. Law J, Boyle J, Harris F, Harkness A, Nye C. Prevalence and natural history of primary  
456 speech and language delay: findings from a systematic review of the literature. *Int J Lang*  
457 *Commun Disord*. 2000;35:165–88. doi:10.1080/136828200247133.
- 458 2. Fox-Boyer A. Aussprachestörungen im Deutschen. In: Fox-Boyer A, Ringmann S,  
459 Siegmüller J, editors. *Handbuch Spracherwerb und Sprachentwicklungsstörungen -*  
460 *Kindergartenphase*. München: Urban & Fischer; 2014a. p. 41–54.
- 461 3. Anthony JL, Aghara RG, Dunkelberger MJ, Anthony TI, Williams JM, Zhang Z. What  
462 factors place children with speech sound disorders at risk for reading problems? *Am J*  
463 *Speech Lang Pathol*. 2011;20:146–60. doi:10.1044/1058-0360(2011/10-0053).
- 464 4. Rvachew S, Rafaat S. Rvachew, S., & Rafaat, S. (2014). Report on benchmark wait  
465 times for pediatric speech sound disorders. *Canadian Journal of Speech-Language*  
466 *Pathology and Audiology*, 38(1), 82-96. *Canadian Journal of Speech-Language*  
467 *Pathology and Audiology*. 2014;38:82–96.
- 468 5. Dodd B. *Differential diagnosis and treatment of children with speech disorder*. London:  
469 Wurr Publishers; 1995.
- 470 6. Eikerling M, Wendt C. Einflussfaktoren auf Lese- und Rechtschreibschwierigkeiten.  
471 *FORUM LOGOPADIE*. 2016;30:34–9. doi:10.2443/skv-s-2016-53020160405.
- 472 7. Schnitzler CD. Schriftsprache und phonologische Verarbeitung bei Grundschulkindern  
473 mit im Vorschulalter überwindenden phonologischen Aussprachestörungen. *Sprache.*  
474 *Stimme. Gehör*. 2015;24–30. doi:10.1055/s-0035-1545270.



- 475 8. Tchoungui Oyono L, Pascoe M, Singh S. The Prevalence of Speech and Language  
476 Disorders in French-Speaking Preschool Children From Yaoundé (Cameroon). *J Speech*  
477 *Lang Hear Res.* 2018;61:1238–50. doi:10.1044/2018\_JSLHR-L-16-0400.
- 478 9. Furlong L, Serry T, Erickson S, Morris ME. Processes and challenges in clinical decision-  
479 making for children with speech-sound disorders. *Int J Lang Commun Disord.*  
480 2018;53:1124–38. doi:10.1111/1460-6984.12426.
- 481 10. McCormack J, Harrison LJ, McLeod S, McAllister L. A nationally representative study of  
482 the association between communication impairment at 4-5 years and children's life  
483 activities at 7-9 years. *J Speech Lang Hear Res.* 2011;54:1328–48. doi:10.1044/1092-  
484 4388(2011/10-0155).
- 485 11. Ebbels SH, McCartney E, Slonims V, Dockrell JE, Norbury CF. Evidence-based  
486 pathways to intervention for children with language disorders. *Int J Lang Commun*  
487 *Disord.* 2019;54:3–19. doi:10.1111/1460-6984.12387.
- 488 12. Günther T, Keller KL, Klingner M. Transfer in die Spontansprache bei Kindern mit einer  
489 phonetischen Aussprachestörung: Kindergartenkinder und Grundschüler im Vergleich.  
490 [Transfer into the Spontaneous Speech of Children with a Speech Sound Disorder: A  
491 Comparison of Kindergarten and Elementary School Children]. *Sprache · Stimme ·*  
492 *Gehör.* 2010;34:173–9.
- 493 13. Brumbaugh KM, Smit AB. Treating children ages 3-6 who have speech sound disorder: a  
494 survey. *Lang Speech Hear Serv Sch.* 2013;44:306–19. doi:10.1044/0161-1461(2013/12-  
495 0029).
- 496 14. Weiner F. Treatment of phonological disability using the method of meaningful minimal  
497 contrast: two case studies. *J Speech Hear Disord.* 1981;46:97–103.  
498 doi:10.1044/jshd.4601.97.
- 499 15. van Riper C, Irwin JK. Artikulationsstörungen. Berlin: Edition; 1994.
- 500 16. Kamhi AG. Treatment decisions for children with speech-sound disorders. *Lang Speech*  
501 *Hear Serv Sch.* 2006;37:271–9. doi:10.1044/0161-1461(2006/031).
- 502 17. Lancaster G, Keusch S, Levin A, Pring T, Martin S. Treating children with phonological  
503 problems: does an eclectic approach to therapy work? *Int J Lang Commun Disord.*  
504 2010;45:174–81. doi:10.3109/13682820902818888.
- 505 18. Baker E, McLeod S. Evidence-based practice for children with speech sound disorders:  
506 part 1 narrative review. *Lang Speech Hear Serv Sch.* 2011;42:102–39.  
507 doi:10.1044/0161-1461(2010/09-0075).
- 508 19. Allen MM. Intervention efficacy and intensity for children with speech sound disorder. *J*  
509 *Speech Lang Hear Res.* 2013;56:865–77. doi:10.1044/1092-4388(2012/11-0076).
- 510 20. Rvachew S, Brosseau-Lapré F. *Developmental Phonological Disorders: Foundations of*  
511 *Clinical Practice.* 2nd ed. San Diego: Plural Publishing Inc; 2018.
- 512 21. Williams AL. Intensity in phonological intervention: is there a prescribed amount? *Int J*  
513 *Speech Lang Pathol.* 2012;14:456–61. doi:10.3109/17549507.2012.688866.
- 514 22. Beier J, Siegmüller J. Intensität in der Kindersprachtherapie - was wir wissen und wo wir  
515 stehen. In: Grötzbach H, editor. *Therapieintensität in der Sprachtherapie/Logopädie.* 1st  
516 ed. Idstein/Ts.: Schulz-Kirchner; 2017. p. 159–185.
- 517 23. Yoder P, Fey ME, Warren SF. Studying the impact of intensity is important but  
518 complicated. *Int J Speech Lang Pathol.* 2012;14:410–3.  
519 doi:10.3109/17549507.2012.685890.
- 520 24. Sozialversicherungsträger. *Ausgewählte Fragen zur Versorgung von Kindern und*  
521 *Jugendlichen durch die österreichische Krankenversicherung;* 2012.
- 522 25. Kaiser A, Seckauer H. *Evaluierung des logopädischen Angebotes für Kinder im*  
523 *Vorschulalter in Oberösterreich. Projektbericht;* 2013.
- 524 26. Morrison JA, Shriberg LD. Articulation testing versus conversational speech sampling. *J*  
525 *Speech Hear Res.* 1992;35:259–73. doi:10.1044/jshr.3502.259.

- 526 27. Fox. A. PLAKKS - Psycholinguistische Analyse kindlicher Aussprachestörungen.  
527 Frankfurt: Pearson; 2005.
- 528 28. Pavelko SL, Owens RE, JR, Ireland M, Hahs-Vaughn DL. Use of Language Sample  
529 Analysis by School-Based SLPs: Results of a Nationwide Survey. *Lang Speech Hear*  
530 *Serv Sch.* 2016;47:246–58. doi:10.1044/2016\_LSHSS-15-0044.
- 531 29. Shriberg LD, Kwiatkowski J. Continuous speech sampling for phonologic analyses of  
532 speech-delayed children. *J Speech Hear Disord.* 1985;50:323–34.  
533 doi:10.1044/jshd.5004.323.
- 534 30. Shriberg LD, Austin D, Lewis BA, McSweeney JL, Wilson DL. The percentage of  
535 consonants correct (PCC) metric: extensions and reliability data. *J Speech Lang Hear*  
536 *Res.* 1997;40:708–22. doi:10.1044/jslhr.4004.708.
- 537 31. Eiserman WD, Weber C, McCoun M. Parent and Professional Roles in Early  
538 Intervention: A Longitudinal Comparison of the Effects of two Intervention Configurations.  
539 *The Journal of Special Education.* 1995;29:20–44. doi:10.1177/002246699502900102.
- 540 32. Fox A. Kindliche Aussprachestörungen. Phonologischer Erwerb. Differenzialdiagnostik.  
541 Therapie. Idstein: Schulz-Kirchner; 2004.
- 542

543

## 544 **Supporting information**

545 **S2 Fig. ETKA SPIRIT study schedule of enrolment, intervention, and assessments**

546 **S1 File. ETKA SPIRIT checklist**

547 **S2 File. ETKA study protocol**

548 **S3 File. ETKA ethical approval**

549 **S4 File. ETKA project orders**

550 **S5 File. ETKA consent form speech and language therapists**

551 **S6 File. ETKA consent form legal guardian**



|                                        | STUDY PERIOD    |          |                   |                |                |
|----------------------------------------|-----------------|----------|-------------------|----------------|----------------|
|                                        | Enrolment       | Baseline | Post-intervention |                |                |
| TIMEPOINT                              | -t <sub>1</sub> | 0        | t <sub>1</sub>    | t <sub>2</sub> | t <sub>3</sub> |
| <b>ENROLMENT:</b>                      |                 |          |                   |                |                |
| Eligibility screening                  | X               |          |                   |                |                |
| Informed consent                       | X               |          |                   |                |                |
| Allocation                             |                 | X        |                   |                |                |
| <b>INTERVENTIONS:</b>                  |                 |          |                   |                |                |
| Early therapy termination              |                 | ←————→   |                   |                |                |
| Ongoing therapy                        |                 | ←————→   |                   |                |                |
| <b>ASSESSMENTS:</b>                    |                 |          |                   |                |                |
| Demographics                           |                 | X        |                   |                |                |
| Information of the therapeutic process |                 | X        |                   |                |                |
| Single-Word-Test                       |                 | X        | X                 | X              | X              |
| Speech sample                          |                 | X        | X                 | X              | X              |

medRxiv preprint doi: <https://doi.org/10.1101/2022.04.14.22273887>; this version posted April 18, 2022. The copyright holder for this preprint (which was not certified by peer review) is the author/funder, who has granted medRxiv a license to display the preprint in perpetuity. It is made available under a [CC-BY 4.0 International license](https://creativecommons.org/licenses/by/4.0/).

Fig. 1
